# Supplementary material
Source: ML conference proceedings conference paper supplement (https://openaccess.thecvf.com/content/CVPR2023/html/Singh_EVAL_Explainable_Video_CVPR_2023_paper.html)
Supplement: Supplementary file 1 [file Singh_EVAL_Explainable_Video_CVPR_2023_supplemental.zip]

Archive with 10 entries (10 files):
- SS_Test026_biker.mp4
- 6684_supplemental.pdf
- Avenue_Test003_AppMot.mp4
- Avenue_Test006_AppMot.mp4
- Ped1_Test006_AppMot.mp4
- Ped1_Test019_AppMot.mp4
- Ped2_Test005_AppMot.mp4
- Ped2_Test006_AppMot.mp4
- SS_Test005_jaywalk.mp4
- SS_Test023_uturn.mp4
